# Supplementary material for: Effects of Pre-Fire Vegetation on the Post-Fire Plant Community Response to Wildfire along a Successional Gradient in Western Juniper Woodlands
Source: MDPI journal article supplement (doi:10.3390/fire6040141), 2023-04-02
Supplement: s1 [file s1]

## Supplemental material

**Table S1.** Table of mean % cover and standard deviation (in parenthesis) for the 14 most common species in the dataset. **A** signifies differences in woodland development phase by burn status (burned vs. unburned) between years; **B** refers to the difference between burned and unburned plots by phase within the same year. The sign after **A** or **B** signifies an increase or decrease in the species cover.

|      |       |      | <i>Achnatherum<br/>nelsonii</i> | <i>Achnatherum<br/>occidentale</i> | <i>Artemisia<br/>tridentata<br/>vaseyana</i> | <i>Balsamorhiza<br/>sagittata</i> | <i>Bromus<br/>tectorum</i> | <i>Ceanothus<br/>velutinus</i>     | <i>Crepis<br/>acuminata</i>          |
|------|-------|------|---------------------------------|------------------------------------|----------------------------------------------|-----------------------------------|----------------------------|------------------------------------|--------------------------------------|
| Year | Phase | Burn |                                 |                                    |                                              |                                   |                            |                                    |                                      |
| 1    | 1     | 0    | 1.3 (1.0)                       | 0.7 (1.1)                          | 13.4 (9.0)                                   | 5.2 (4.9)                         | 0.0                        | 0.0                                | 0.3 (0.2)                            |
| 1    | 2     | 0    | 0.8 (0.7)                       | 0.2 (0.4)                          | 5.9 (4.3)                                    | 2.4 (1.6)                         | 0.0                        | 0.0                                | 0.6 (0.3)                            |
| 1    | 3     | 0    | 1.0 (0.6)                       | 0.1 (0.1)                          | 0.2 (0.4)                                    | 0.8 (0.7)                         | 0.0                        | 0.0                                | 0.1 (0.1)                            |
| 1    | 4     | 0    | 0.1 (0.2)                       | 0.1 (0.3)                          | 0.4 (0.8)                                    | 0.6 (0.8)                         | 0.1 (0.2)                  | 0.0                                | 0.1 (0.2)                            |
| 1    | 1     | 1    | 1.9 (1.8)                       | 0.2 (0.2)                          | 0.8 (2.1) <sup>B-</sup>                      | 4.9 (3.7)                         | 0.0 (0.0)                  | 0.7 (1.5)                          | 0.5 (0.3)                            |
| 1    | 2     | 1    | 1.5 (0.8)                       | 0.5 (0.5)                          | 0.0 (0.0)                                    | 3.8 (4.5)                         | 0.3 (0.7)                  | 2.3 (3.2)                          | 0.9 (0.2)                            |
| 1    | 3     | 1    | 0.5 (0.8)                       | 0.5 (0.8)                          | 0.1 (0.2)                                    | 0.8 (1.3)                         | 1.8 (4.0)                  | 19.8 (20.1) <sup>B+</sup>          | 0.3 (0.5)                            |
| 1    | 4     | 1    | 0.2 (0.3)                       | 0.2 (0.4)                          | 0.0                                          | 1.0 (0.9)                         | 0.8 (1.4)                  | 23.5 (16.9) <sup>B+</sup>          | 0.5 (0.5)                            |
| 2    | 1     | 0    | 1.4 (0.9)                       | 0.5 (1.2)                          | 11.1 (5.8)                                   | 5.3 (3.8)                         | 0.4 (0.9)                  | 0.0                                | 0.7 (0.6)                            |
| 2    | 2     | 0    | 1.0 (0.7)                       | 0.3 (0.5)                          | 2.7 (3.4)                                    | 1.3 (1.2)                         | 1.2 (1.1)                  | 0.0                                | 0.4 (0.3)                            |
| 2    | 3     | 0    | 0.6 (0.4)                       | 0.2 (0.4)                          | 0.1 (0.2)                                    | 1.1 (0.9)                         | 0.1 (0.1)                  | 0.0                                | 0.1 (0.1)                            |
| 2    | 4     | 0    | 0.4 (0.4)                       | 0.1 (0.3)                          | 0.3 (0.4)                                    | 1.0 (1.6)                         | 0.1 (0.2)                  | 0.0                                | 0.3 (0.3)                            |
| 2    | 1     | 1    | 0.9 (1.0)                       | 1.1 (1.9)                          | 3.9 (9.0)                                    | 6.3 (4.3) <sup>A+</sup>           | 1.1 (1.5)                  | 0.9 (1.6)                          | 1.8 (0.9) <sup>A+,B+</sup>           |
| 2    | 2     | 1    | 4.2 (2.2) <sup>A+,B+</sup>      | 1.0 (1.1)                          | 2.4 (3.1)                                    | 4.8 (5.0)                         | 0.7 (1.6)                  | 8.3 (10.7)                         | 2.3 (0.8) <sup>A+,B+</sup>           |
| 2    | 3     | 1    | 2.2 (1.9) <sup>A+</sup>         | 1.7 (2.2)                          | 0.3 (0.8)                                    | 0.5 (0.7)                         | 0.3 (0.5)                  | 35.0 (27.3) <sup>A+,B+</sup>       | 1.2 (1.0) <sup>A+,B+</sup>           |
| 2    | 4     | 1    | 1.4 (1.4) <sup>A+</sup>         | 1.6 (2.3)                          | 0.0 (0.0)                                    | 3.5 (5.7)                         | 0.5 (0.4)                  | 38.0 (20.3) <sup>A+,B+</sup>       | 1.6 (1.3) <sup>A+,B+</sup>           |
|      |       |      | <i>Elymus<br/>elymoides</i>     | <i>Festuca<br/>idahoensis</i>      | <i>Juniperus<br/>occidentalis</i>            | <i>Lupinus<br/>sericeus</i>       | <i>Poa<br/>secunda</i>     | <i>Pseudoroegneria<br/>spicata</i> | <i>Symphoricarpos<br/>oreophilus</i> |
| Year | Phase | Burn |                                 |                                    |                                              |                                   |                            |                                    |                                      |
| 1    | 1     | 0    | 0.3 (0.5)                       | 5.1 (5.5)                          | 3.0 (2.4)                                    | 5.0 (4.7)                         | 0.9 (0.5)                  | 2.4 (3.3)                          | 1.0 (1.1)                            |
| 1    | 2     | 0    | 0.1 (0.2)                       | 4.2 (4.2)                          | 14.2 (8.8)                                   | 2.5 (2.3)                         | 0.8 (0.5)                  | 0.2 (0.2)                          | 0.9 (1.0)                            |
| 1    | 3     | 0    | 0.1 (0.2)                       | 0.3 (0.4)                          | 45.0 (14.1)                                  | 0.3 (0.6)                         | 0.1 (0.1)                  | 0.0 (0.0)                          | 3.1 (2.1)                            |
| 1    | 4     | 0    | 0.1 (0.2)                       | 1.0 (1.5)                          | 43.8 (15.6)                                  | 0.1 (0.2)                         | 0.5 (0.5)                  | 0.0 (0.1)                          | 3.2 (7.5)                            |
| 1    | 1     | 1    | 0.0 (0.0)                       | 3.8 (2.0)                          | 2.0 (2.4)                                    | 2.3 (1.6)                         | 0.8 (0.9)                  | 3.0 (3.1)                          | 1.0 (0.7)                            |
| 1    | 2     | 1    | 0.1 (0.1)                       | 0.9 (0.9)                          | 0.0 <sup>B-</sup>                            | 3.9 (2.0)                         | 1.3 (1.1)                  | 1.3 (1.4)                          | 0.5 (0.6)                            |
| 1    | 3     | 1    | 0.3 (0.3)                       | 0.6 (1.4)                          | 8.2 (14.9) <sup>B-</sup>                     | 0.6 (0.8)                         | 0.5 (0.6)                  | 0.3 (0.6)                          | 0.3 (1.0) <sup>B-</sup>              |
| 1    | 4     | 1    | 0.1 (0.1)                       | 0.0 (0.1)                          | 0.0 <sup>B-</sup>                            | 0.6 (1.0)                         | 0.2 (0.5)                  | 0.3 (0.7)                          | 0.2 (0.5)                            |
| 2    | 1     | 0    | 0.2 (0.2)                       | 9.7 (5.2) <sup>A+</sup>            | 4.0 (2.6)                                    | 2.9 (1.1)                         | 3.0 (0.9) <sup>A+</sup>    | 2.3 (2.3)                          | 0.2 (0.3)                            |
| 2    | 2     | 0    | 0.1 (0.1)                       | 3.8 (4.3)                          | 17.1 (5.8)                                   | 1.4 (1.5)                         | 1.3 (0.8)                  | 0.4 (0.6)                          | 2.4 (3.5)                            |
| 2    | 3     | 0    | 0.3 (0.2)                       | 0.8 (1.6)                          | 44.1 (10.8)                                  | 0.5 (1.0)                         | 0.6 (0.6)                  | 0.1 (0.2)                          | 2.3 (1.4)                            |
| 2    | 4     | 0    | 0.6 (0.4) <sup>A+</sup>         | 1.8 (1.6) <sup>A+</sup>            | 42.6 (11.3)                                  | 0.2 (0.3)                         | 2.1 (1.8)                  | 0.1 (0.1)                          | 0.3 (0.5)                            |
| 2    | 1     | 1    | 0.9 (1.4) <sup>B+</sup>         | 6.8 (5.0) <sup>A+</sup>            | 1.1 (1.6)                                    | 2.0 (1.6)                         | 3.4 (1.6) <sup>A+</sup>    | 7.7 (4.7) <sup>A+,B+</sup>         | 0.7 (0.7)                            |
| 2    | 2     | 1    | 2.1 (1.3) <sup>A+</sup>         | 3.6 (3.2) <sup>A+</sup>            | 0.0 (0.0) <sup>B-</sup>                      | 2.8 (2.2)                         | 3.9 (0.8) <sup>A+,B+</sup> | 5.7 (5.0) <sup>A+,B+</sup>         | 1.3 (2.3)                            |
| 2    | 3     | 1    | 4.1 (1.5) <sup>A+,B+</sup>      | 0.3 (0.6)                          | 1.5 (3.0) <sup>B-</sup>                      | 0.7 (0.9)                         | 3.2 (2.3) <sup>A+,B+</sup> | 0.9 (1.6)                          | 1.4 (3.5)                            |
| 2    | 4     | 1    | 5.0 (2.1) <sup>A+,B+</sup>      | 0.1 (0.4) <sup>B-</sup>            | 0.0 (0.1) <sup>B-</sup>                      | 0.8 (1.0)                         | 2.4 (2.9)                  | 0.8 (1.9)                          | 1.0 (2.9)                            |
